# Supplementary material
Source: publisher site journal article supplement (https://www.dovepress.com/article/246126)
Supplement: Supplementary file 1 [file get_supplementary_file.php]

**Supplemental Table 1: Information of the patients, airway lesions and therapeutic procedures**

| **Case NO.** | **Age** | **Gender** | **Cause of airway obstruction** | **Smoking History (Pack-Year)** | **Stenotic site** | **Therapy** |
| --- | --- | --- | --- | --- | --- | --- |
| 1 | 65 | M | GPA | 22 | Upper trachea | Ballooning, APC |
| 2 | 64 | M | Lung Cancer (Sq.) | 42 | Orifice of right upper branch | Y-shape Dumon stent at the orifice of right upper branch |
| 3 | 78 | M | Thyroid cancer | 60 | Upper trachea | EMS |
| 4 | 70 | M | Esophageal cancer | 4.5 | Left main bronchus | EMS |
| 5 | 73 | M | Renal cell carcinoma | 16 | Carina to left main bronchus | Y-shape Dumon stent |
| 6 | 62 | M | Inflammatory polyp | 33 | Middle trachea | Snare resection, APC |
| 7 | 49 | F | Posttracheostomy tracheal obstruction | 0 | Upper trachea | Observation |
| 8 | 71 | M | Lung cancer (Sq.) | 48 | Right main bronchus | Snare resection, APC |
| 9 | 54 | F | Metastatic mediastinal lymphnode from leiomyosarcoma of the uterus | 0 | Lower trachea | EMS |
| 10 | 66 | F | Lung cancer (Ad.) | 0 | Lower trachea | EMS |
| 11 | 74 | F | Tracheobronchial metastasis of pancreatic cancer | 0 | Right main bronchus | Snare resection, APC |
| 12 | 60 | M | Endobronchial metastasis of rectal cancer | 7.5 | Left main bronchus | EMS |
| 13 | 67 | M | Lung cancer (Sq.) | 46 | Right main bronchus | EMS |
| 14 | 47 | F | Bronchial Schwannoma | 85 | Right main bronchus | Snare resection, APC |
| 15 | 64 | M | Posttracheostomy tracheal obstruction | 64.5 | Upper trachea | APC |
| 16 | 72 | M | Small cell lung cancer | 100 | Upper to middle trachea | EMS |

M: male, F: female, GPA: granulomatosis with polyangitis, Sq.: squamous cell carcinoma, Ad.: adenocarcinoma, APC: argon plasma coagulation, EMS: expandable metallic stent, No. = Number code.

**Supplemental Table 2: Measurement details in our institution using MostGraph-01®**

| **Apparatus** | Equipped loud speaker is able to develop peak-to-peak pressure variation in 0.2kPa at the airway opening. The variation did not exceed 0.5kPa. |
| --- | --- |
| **Input signal frequencies** | Oscillation signals: Random noise and Hanning impulses (4~36Hz, 0.25sec. intervals). |
| **Individual recording duration** | At least 30sec. |
| **Number of repeats** | At least 3 |
| **Recorded impedance values** | The mean value during a respiratory cycle (whole breath). Inspiratory and Expiratory phases. Difference between the inspiratory and expiratory phases (Δ). |
| **Breathing protocols** | Quiet tidal breathing at functional residual capacity level. Both nose-clip and cheek support were also performed. |
| **Head and body position** | Seated in upright posture with neutral to slightly extended head position. |

**Supplemental Table 3: Other Pulmonary Function Tests**

|  | **CAO (n=12)** | **COPD (n=75)** | **COPD with airway wall thickening (n=31)** | **COPD without airway wall thickening (n=44)** |
| --- | --- | --- | --- | --- |
| **%FRC** | 96.23±8.87 | 96.82±2.40 | 93.49±3.33 | 99.17±3.34 |
| **%RV** | 112.29±8.72 | 141.57±3.73*** | 142.76±6.92* | 140.73±4.15*** |
| **%TLC** | 95.98±6.58 | 108.18±1.50 | 106.19±2.34 | 109.58±1.94 |
| **%RV/TLC** | 119.61±4.87 | 112.07±2.13 | 114.17±3.53 | 110.60±2.65 |
| **%DLco** | 68.61±5.47 | 63.92±2.27 | 69.18±3.78 | 60.22±2.69 |
| **%DLco/VA (S)** | 105.30±10.94 | 84.51±3.34* | 93.38±5.63 | 78.26±3.86*** |
| **ΔN2 (%N2/L)** | 2.04±0.53 | 3.39±0.21* | 3.10±0.25 | 3.60±0.32* |

Values are mean ± standard error of the mean. ****P<0.001. ***P<0.005, **<0.01, *<0.05 vs. CAO

FRC, Functional residual capacity; RV, Residual Volume; TLC, Total lung capacity; DLco, Diffusing capacity of lung for carbon monoxide; VA, Alveolar volume

**Supplemental Table 4: Regression analyses between RV, MMF and several FOT parameters**

|  | **RV(%) in COPD (n=31)** | **MMF (%) in COPD (n=31)** | **%V25 in COPD (n=31)** |
| --- | --- | --- | --- |
|  | R | R | R |
| X5 In-Ex | 0.53** | -0.35 | -0.089 |
| Fres In-Ex | -0.29 | 0.26 | 0.029 |
| ALX In-Ex | -0.59*** | 0.38* | 0.11 |

***P<0.001, **<0.01, *<0.05

These 31 subjects of COPD were airway wall thickening phenotype.
